1 **H3.3K4M destabilizes enhancer epigenomic writers MLL3/4 and impairs adipose tissue**  
2 **development**

3

4 Younghoon Jang<sup>1</sup>, Chaochen Wang<sup>1</sup>, Aaron Broun<sup>1</sup>, Young-Kwon Park<sup>1</sup>, Lenan Zhuang<sup>1</sup>, Ji-Eun Lee<sup>1</sup>,  
5 Eugene Froimchuk<sup>1</sup>, Chengyu Liu<sup>2</sup>, and Kai Ge<sup>1</sup>

6

7 <sup>1</sup>*Adipocyte Biology and Gene Regulation Section, Laboratory of Endocrinology and Receptor Biology,*  
8 *National Institute of Diabetes and Digestive and Kidney Diseases, National Institutes of Health, Bethesda,*  
9 *MD 20892*

10 <sup>2</sup>*Transgenic Core, National Heart, Lung, and Blood Institute, NIH, Bethesda, MD 20892*

11

12 \*Correspondence: [kai.ge@nih.gov](mailto:kai.ge@nih.gov)

13 **Abstract**

14 Histone H3K4 mono-methyltransferases MLL3 and MLL4 (MLL3/4) are required for enhancer activation  
15 during cell differentiation, though the mechanism is incompletely understood. To address MLL3/4  
16 enzymatic activity in enhancer regulation, we have generated two mouse lines: one expressing H3.3K4M,  
17 a lysine-4-to-methionine (K4M) mutation of histone H3.3 that inhibits H3K4 methylation, and the other  
18 carrying conditional double knockout of MLL3/4 enzymatic SET domains. Expression of H3.3K4M in  
19 lineage-specific precursor cells depletes H3K4 methylation and prevents adipogenesis and adipose tissue  
20 development. Mechanistically, H3.3K4M prevents enhancer activation in adipogenesis by destabilizing  
21 MLL3/4 proteins but not other Set1-like H3K4 methyltransferases. Notably, deletion of the enzymatic SET  
22 domain of MLL3/4 in lineage-specific precursor cells mimics H3.3K4M expression and prevents adipose  
23 tissue development. Interestingly, destabilization of MLL3/4 by H3.3K4M in adipocytes does not affect  
24 adipose tissue maintenance and function. Together, our findings indicate that H3.3K4M destabilizes  
25 enhancer epigenomic writers MLL3/4 and impairs adipose tissue development.

## 26 **Introduction**

27 During cell differentiation, transcriptional enhancers are bound by lineage-determining transcription  
28 factors (LDTFs) and play a key role in regulating cell type-specific gene expression. Cell type-specific  
29 enhancers are marked by specific epigenomic features <sup>1</sup>. Histone 3 lysine 4 (H3K4) mono-methylation  
30 (H3K4me1) is the predominant mark of a primed enhancer state. Histone 3 lysine 27 acetylation  
31 (H3K27ac) by H3K27 acetyltransferases CBP/p300 further follows H3K4me1 to mark an active enhancer  
32 state <sup>2</sup>. There are six mammalian Set1-like H3K4 methyltransferases, each containing a catalytic SET  
33 domain that enables the deposition of methyl marks on H3K4: MLL1 (or KMT2A), MLL2 (or KMT2B),  
34 MLL3 (or KMT2C), MLL4 (or KMT2D), SET1A (or KMT2F), and SET1B (or KMT2G) <sup>3</sup>. Among them,  
35 MLL4 is a major mammalian H3K4 mono-methyltransferase with partial functional redundancy with MLL3.  
36 MLL3 and MLL4 (MLL3/4) are required for CBP/p300-mediated enhancer activation in cell differentiation  
37 and cell fate transition <sup>4-6</sup>. Deletion of *Mll3/4* genes depletes H3K4me1 in cells and prevents the  
38 enrichment of CBP/p300-mediated H3K27ac, epigenome reader BRD4, Mediator coactivator complex,  
39 and RNA Polymerase II on enhancers. Consequently, *Mll3/4* deletion prevents enhancer RNA production,  
40 cell type-specific gene induction and cell differentiation <sup>7</sup>. However, the role of H3K4me1 in enhancer  
41 regulation, cell differentiation and function *in vivo* is poorly understood.

42 Adipogenesis and adipose tissue are useful model systems for studying cell differentiation as well  
43 as tissue development and function. Adipogenesis is mainly controlled by a cascade of sequentially  
44 expressed transcription factors (TFs) <sup>8</sup>. Although many TFs have been implicated in adipogenesis, PPAR $\gamma$   
45 and C/EBP $\alpha$  are primary drivers of the induction of thousands of adipocyte genes <sup>9,10</sup>. Adipose tissues,  
46 including white adipose tissue (WAT) and brown adipose tissue (BAT), are dynamic endocrine organs  
47 that regulate thermogenesis, energy metabolism and homeostasis <sup>11</sup>. The study of adipogenesis and  
48 adipose tissue *in vivo* requires the isolation of tissues of the adipose lineage at particular developmental  
49 and functional stages. Myogenic factor 5 (*Myf5*) promoter-driven Cre (*Myf5-Cre*) allows factors to be  
50 expressed or deleted in mouse preadipocytes, enabling a focus on adipogenesis. Conversely,  
51 *Adiponectin* promoter-driven Cre (*Adiponectin-Cre*) is generally expressed in differentiated adipocytes but  
52 not precursor cells, permitting study of adipocyte function <sup>12</sup>. By crossing *Mll4* conditional knockout (KO)  
53 mice with *Myf5-Cre* or *Adiponectin-Cre* mice, we have shown that MLL4 is required for adipose tissue

54 development but largely dispensable for adipose tissue maintenance<sup>4,5</sup>. However, the roles of MLL3/4  
55 enzymatic activities and MLL3/4-mediated H3K4me1 in adipose tissue development and function are  
56 unclear.

57 By tissue-specific ectopic expression of a histone H3.3 lysine-to-methionine mutant (H3.3K4M) in  
58 mice, we show that depletion of H3K4 methylation by H3.3K4M inhibits adipose tissue development. By  
59 tissue-specific deletion of the enzymatic SET domain of MLL3/4 in mice, we further show that the SET  
60 domain is required for adipose tissue development. Mechanistically, expression of H3.3K4M or deletion of  
61 the SET domain prevents MLL3/4-mediated enhancer activation in adipogenesis by destabilizing MLL3/4  
62 proteins. Interestingly, H3.3K4M does not affect adipose tissue maintenance nor the thermogenic function  
63 of BAT.

## 64 **Results**

### 65 **Histone H3.3K4M and H3.3K36M mutations impair adipogenesis**

66 Previous studies reported that ectopic expression of histone H3.3 lysine-to-methionine (K-to-M) mutant  
67 specifically depletes endogenous lysine methylation in cells<sup>13,14</sup>. To understand the role of site-specific  
68 histone methylation in adipogenesis, we used retroviruses to stably express wild type (WT) or K-to-M  
69 mutant (K4M, K9M, K27M or K36M) of histone H3.3 in brown preadipocytes. The expression levels of  
70 FLAG-tagged H3.3 were much lower than that of endogenous H3 (Figure 1a). Consistent with previous  
71 reports<sup>13,14</sup>, ectopic expression of H3.3K4M selectively decreased global H3K4me1, H3K4me2, and  
72 H3K4me3 levels, while H3.3K9M and H3.3K27M selectively decreased global levels of H3K9me2 and  
73 H3K27me3, respectively. Ectopic expression of H3.3K36M selectively depleted global H3K36me2 and  
74 moderately increased H3K27me3 levels (Figure 1a and Supplementary Fig S1a). Cells were induced to  
75 undergo adipogenesis. As shown in Figure 1b-c, H3.3K4M-expressing (K4M) cells showed severe  
76 defects in adipogenesis and associated expression of adipogenesis markers *Pparg*, *Cebpa* and *Fabp4*.  
77 Consistent with our recent report<sup>29</sup>, H3.3K36M-expressing cells also showed defects in adipogenesis.  
78 These results indicate that histone H3.3K4M and H3.3K36M mutations impair adipogenesis.

### 79 **H3.3K4M inhibits adipose tissue and muscle development**

80 Next, we investigated whether H3.3K4M affects adipose tissue development *in vivo*. We generated a  
81 conditional H3.3K4M transgenic mouse line, lox-STOP-lox-H3.3K4M (LSL-K4M) for tissue-specific  
82 expression of H3.3K4M. The insertion of 4 copies of SV40 stop signals (STOP) flanked by two loxP sites  
83 prevents the CAG promoter-driven expression of FLAG-tagged H3.3K4M in the absence of Cre (Figure  
84 2a-b). We crossed LSL-K4M mice with *Myf5-Cre* mice to induce H3.3K4M expression specifically in  
85 somitic precursor cells of brown adipose tissue (BAT) and skeletal muscle<sup>4</sup>. No LSL-K4M;*Myf5-Cre* mice  
86 were observed at the weaning age. Newborn (P0) LSL-K4M;*Myf5-Cre* pups were obtained but died  
87 immediately after birth from breathing malfunctions due to deficient muscle groups in the rib cage (Figure  
88 2c-d). Immunohistochemical analysis of cervical regions of E18.5 LSL-K4M;*Myf5-Cre* embryos revealed  
89 marked reduction in BAT and back muscle mass (Figure 2e-f), indicating that expressing H3.3K4M in  
90 progenitor cells prevents adipose tissue and muscle development *in vivo*.

### 91 **H3.3K4M destabilizes MLL3/4 proteins in adipogenesis**

92 To confirm that H3.3K4M prevents adipogenesis in a cell autonomous manner, we crossed LSL-K4M with  
93 *Cre-ER* mice to obtain primary LSL-K4M;*Cre-ER* brown preadipocytes. After immortalization, cells were  
94 treated with 4-hydroxytamoxifen (4OHT) to delete the STOP cassette and induce FLAG-tagged H3.3K4M  
95 expression. As expected, induction of H3.3K4M expression decreased global levels of endogenous  
96 H3K4me1/2/3. Interestingly, H3.3K4M expression also decreased H3K27ac levels (Figure 3a). Consistent  
97 with our previous findings observed in embryonic stem (ES) cells<sup>15</sup>, expressing H3.3K4M destabilized  
98 endogenous MLL3/4 as well as the MLL3/4-associated protein UTX in cells. However, H3.3K4M did not  
99 affect protein levels of other members of the mammalian Set1-like H3K4 methyltransferase family,  
100 including SET1A, SET1B, and MLL1<sup>16</sup> (Figure 3b).

101 Ectopic expression of H3.3K4M had little effect on cell proliferation (Figure 3c), but prevented  
102 adipogenesis and the induction of adipocyte marker genes such as *Pparg*, *Cebpa* and *Fabp4* as well as  
103 BAT-specific marker gene *Ucp1* (Figure 3d-e). We confirmed these H3.3K4M-driven adipogenesis defects  
104 using independent brown preadipocyte lines stably expressing WT H3.3 or H3.3K4M (Supplementary Fig  
105 S1). To investigate how H3.3K4M inhibits adipogenesis, we further performed RNA-seq analysis of LSL-  
106 K4M;*Cre-ER* preadipocytes treated with or without 4OHT. Using a 2.5-fold cut-off for differential gene

107 expression from RNA-seq analysis, we defined genes up-regulated (605/5.0%) or down-regulated  
108 (709/5.8%) by H3.3K4M at D7 of differentiation (Figure 3f-g). Gene ontology (GO) analysis showed that  
109 down-regulated genes were strongly associated functionally with fat cell differentiation and lipid  
110 metabolism (Figure 3h). Because MLL3/4 are essential for adipogenesis<sup>4</sup>, these data suggest that  
111 H3.3K4M inhibits adipogenesis at least in part by destabilizing MLL3/4 proteins.

### 112 **H3.3K4M prevents MLL3/4-mediated enhancer activation in adipogenesis**

113 Next, we investigated whether H3.3K4M affects MLL3/4-mediated enhancer activation in adipogenesis.  
114 We performed ChIP-seq analyses of enhancer marks H3K4me1 and H3K27ac in LSL-K4M;*Cre-ER* cells  
115 treated with or without 4OHT at D4 of adipogenesis. Since ChIP-seq analysis did not consider the global  
116 differences between samples, we used histone Western blot data as a normalization control for more  
117 accurate quantitative analysis of H3K4me1 and H3K27ac (Supplementary Fig S2). By comparing with the  
118 published MLL4 ChIP-seq data during adipogenesis<sup>4,6</sup>, we identified 6,686 MLL4<sup>+</sup> active enhancers  
119 during adipogenesis. 4OHT-induced H3.3K4M expression prevented H3K4me1 and H3K27ac  
120 accumulation on MLL4<sup>+</sup> active enhancers during adipogenesis (Figure 4a-b). Similar results were  
121 observed on *Pparg* and *Cebpa* loci (Figure 4c). Further, ChIP-qPCR analyses revealed that, on  
122 representative MLL4<sup>+</sup> active enhancers (e1-e5) located on gene loci of master adipogenic regulators  
123 PPAR $\gamma$  and CEBP $\alpha$ <sup>7</sup>, H3.3K4M markedly reduced the occupancy of MLL4, MLL3/MLL4-mediated  
124 H3K4me1, CBP/p300-mediated H3K27ac, BRD4, the MED1 subunit of the Mediator coactivator complex,  
125 and Pol II (Figure 4c-d). H3.3K4M also decreased eRNA production from MLL4<sup>+</sup> adipogenic enhancers  
126 (Figure 4e). Together, these results suggest that H3.3K4M prevents MLL3/4-mediated enhancer  
127 activation in adipogenesis.

### 128 **Deletion of the enzymatic SET domain of MLL3/4 prevents adipose tissue and muscle** 129 **development**

130 MLL3 and MLL4 are partially redundant and are major H3K4 mono-methyltransferases on enhancers in  
131 cells<sup>4</sup>. In a separate attempt to investigate the functional role of MLL3/4 enzymatic activity in  
132 differentiation and development *in vivo*, we used two conditional KO mouse lines targeting the enzymatic  
133 SET domain of MLL3 and MLL4 (*Mll3<sup>eff</sup>* and *Mll4SET<sup>eff</sup>*, Figure 5a-b). In the *Mll3<sup>eff</sup>* mice, exons 57 and 58,

134 which encode critical amino acids of the SET domain, were flanked by two loxP sites<sup>17</sup>. In the *Mll4SET<sup>ff</sup>*  
135 mice, exons 50 and 51, which encode the entire SET domain, were flanked by two loxP sites. Cre-  
136 mediated deletion of these exons would result in the production of enzyme-dead MLL3/4.

137 We first crossed *Mll4SET<sup>ff</sup>* with *Myf5-Cre* mice. The resulting *Mll4SET<sup>ff</sup>;Myf5-Cre* mice survived  
138 until birth. E17.5~18.5 *Mll4SET<sup>ff</sup>;Myf5-Cre* embryos were unable to breathe and died immediately after  
139 isolation, displaying an abnormal hunched posture and severe reduction of back muscles (Supplementary  
140 Fig S3a-c). These embryos showed only a moderate decrease of BAT mass compared to WT, possibly  
141 due to a compensatory effect of MLL3 (Supplementary Fig S3c). To eliminate the compensatory effect,  
142 we crossed *Mll4SET<sup>ff</sup>* with *Mll3<sup>ff</sup>* and *Myf5-Cre* mice to delete both *Mll3* and *Mll4* genes in progenitor cells  
143 of BAT and muscle lineages. The resulting E18.5 *Mll3<sup>ff</sup>;Mll4SET<sup>ff</sup>;Myf5-Cre* (conditional double KO, DKO)  
144 embryos were unable to breathe and died immediately after isolation. These embryos showed profound  
145 reduction of BAT as well as muscle mass (Figure 5c-e). These data indicate that deletion of the enzymatic  
146 SET domain of MLL3/4 prevents adipose tissue and muscle development.

#### 147 **Deletion of the enzymatic SET domain inhibits adipogenesis by destabilizing MLL3/4**

148 To confirm that deletion of the enzymatic SET domain of MLL3/4 prevents adipogenesis in a cell  
149 autonomous manner, we crossed *Mll3<sup>ff</sup>;Mll4SET<sup>ff</sup>* mice with *Cre-ER* mice to obtain primary  
150 *Mll3<sup>ff</sup>;Mll4SET<sup>ff</sup>;Cre-ER* brown preadipocytes. After immortalization, cells were treated with 4OHT to  
151 delete exons encoding the SET domain of MLL3/4. Consistent with our previous finding that MLL3 and  
152 MLL4 are major H3K4 mono- and di-methyltransferases in cells<sup>4,5</sup>, deletion of the enzymatic SET domain  
153 in preadipocytes decreased global levels of endogenous H3K4me1/2 but not H3K4me3 (Figure 6a). In  
154 addition, deleting the enzymatic SET domain destabilized endogenous MLL3/4 and reduced protein levels  
155 of MLL3/4-associated UTX in cells (Figure 6b), which is consistent with a recent report that deleting the  
156 SET domain destabilizes MLL3/4 in ES cells<sup>18</sup>.

157 Deletion of the enzymatic SET domain of MLL3/4 had little effect on cell proliferation (Figure 6c),  
158 but prevented adipogenesis and the induction of *Pparg*, *Cebpa*, *Fabp4*, and *Ucp1* (Figure 6d-e). RNA-seq  
159 analysis at D7 of differentiation confirmed the deletion of target exons of both *Mll3* and *Mll4* loci (Figure  
160 6f). We further performed RNA-seq analysis of *Mll3<sup>ff</sup>;Mll4SET<sup>ff</sup>;Cre-ER* preadipocytes treated with or  
161 without 4OHT. Using a 2.5-fold cut-off for differential expression from RNA-seq analysis, we defined

162 genes up-regulated (623/5.1%) or down-regulated (890/7.3%) by deletion of the enzymatic SET domain  
163 at D7 of differentiation (Figure 6g-h). GO analysis showed that down-regulated genes were strongly  
164 functionally associated with fat cell differentiation and lipid metabolism (Figure 6i). These data suggest  
165 that deletion of the enzymatic SET domain inhibits adipogenesis by destabilizing MLL3/4.

### 166 **H3.3K4M expression mimics MLL3/4 SET domain deletion in preventing adipogenesis**

167 Next, we generated scatter plots of gene expression changes using RNA-seq data from cells with deletion  
168 of MLL3/4 SET domain (DKO) and cells with expression of H3.3K4M (K4M) (Figure 7a). A combined  
169 scatter plot revealed that down- or up-regulated genes were highly correlated between DKO and K4M  
170 cells (Figure 7b). We found that the majority of down or up-regulated genes at D7 of differentiation were  
171 shared by DKO and K4M (Figure 7c-d). The shared down-regulated genes were highly associated  
172 functionally with fat cell differentiation and lipid metabolism whereas shared up-regulated genes were  
173 highly associated with cell proliferation and development (Figure 7e-f). These data suggest that ectopic  
174 H3.3K4M mimics the effect of MLL3/4 SET domain deletion in preventing adipogenesis.

### 175 **H3.3K4M does not affect adipose tissue maintenance and function**

176 We also investigated the role of H3K4 methylation in adipose tissue maintenance and function in mice.  
177 For this purpose, we crossed LSL-K4M mice with *Adipoq-Cre* mice to achieve adipocyte-selective  
178 expression of H3.3K4M *in vivo*. Histone Western blot of BAT from LSL-K4M;*Adipoq-Cre* mice showed that  
179 ectopic expression of H3.3K4M depleted endogenous H3K4me1/2/3 and MLL3/4 levels in BAT (Figure  
180 8a-b). LSL-K4M;*Adipoq-Cre* mice did not show any discernable differences in body weight, fat/lean mass,  
181 or adipose tissue mass relative to control (LSL-K4M) mice at 8-10 weeks of age (Figure 8c-e). In the BAT,  
182 induction of H3.3K4M expression was successful in LSL-K4M;*Adipoq-Cre* mice, but the expression levels  
183 of adipocyte identity genes *Pparg*, *Cebpa*, and *Fabp4* were similar between LSL-K4M;*Adipoq-Cre* and  
184 control mice (Figure 8f). This phenotype is consistent with what we have reported for the  
185 *Mll4SET<sup>fl</sup>*;*Adipoq-Cre* mice, in which MLL4 is dispensable for the maintenance of differentiated  
186 adipocytes *in vivo*<sup>5</sup>.

187 We further asked about the functional consequence of ectopic H3.3K4M expression in adipocytes  
188 *in vivo*. For this purpose, we acutely exposed the mice to environmental cold (6°C) up to 6 h. LSL-

189 K4M;*Adipoq-Cre* mice maintained normal body temperatures, were cold tolerant and behaved similarly as  
190 control mice in the cold tolerance test (Figure 8g). After cold exposure, expression levels of  
191 thermogenesis genes *Ucp1*, *Dio2*, and *Elovl3* were similarly induced in BAT of LSL-K4M;*Adipoq-Cre* and  
192 control mice (Figure 8h). Together, our data indicate that while H3.3K4M prevents adipose tissue  
193 development, it does not affect the maintenance and function of adipose tissues. Our data also suggest  
194 that H3K4 methylation is dispensable for the maintenance and function of differentiated adipocytes.

## 195 **Discussion**

196 Site-specific histone methylations are generally correlated with gene activation or gene repression. To  
197 investigate the role of site-specific histone methylations in cell differentiation and development, we  
198 screened several K-to-M mutants of H3.3 and found that H3.3K4M and H3.3K36M mutations impair  
199 adipogenesis in cell culture. Mechanistically, H3.3K4M destabilizes MLL3/4 proteins but not other  
200 members of the mammalian Set1-like H3K4 methyltransferase family, including SET1A, SET1B, and  
201 MLL1. Consequently, H3.3K4M prevents MLL3/4-mediated enhancer activation in adipogenesis. Using  
202 tissue-specific expression of H3.3K4M in mice, we next showed that H3.3K4M inhibits adipose tissue and  
203 muscle development. However, H3.3K4M does not affect adipose tissue maintenance nor the  
204 thermogenic function of BAT. Using tissue-specific deletion of the enzymatic SET domains of MLL3/4 in  
205 mice, we demonstrated that the SET domains are required for adipose tissue and muscle development.  
206 Mechanistically, deletion of the SET domains destabilizes MLL3/4 proteins. Notably, H3.3K4M expression  
207 mimics MLL3/4 SET domain deletion in preventing adipogenesis. Together, our findings suggest that  
208 H3.3K4M destabilizes enhancer epigenomic writers MLL3/4 and impairs adipose tissue development  
209 (Figure 4f).

210 Consistent with our observation in preadipocytes, it was shown recently that MLL3/4 proteins with  
211 SET domain deletion are unstable in ES cells<sup>18</sup>. However, another recent report contradictorily showed  
212 no MLL3/4 protein stability defects in ES cells with MLL3/4 SET domain deletion<sup>19</sup>. To find out what  
213 caused such discrepancies, we examined the different designs for SET domain deletion on MLL3/4  
214 proteins in these three studies. We showed that deleting exons 57 and 58 results in a destabilized MLL3  
215 protein in cells (Figure 6b). In contrast, Rickels et al. deleted exons 56, 57 and 58 without affecting MLL3



216 protein stability in cells<sup>19</sup>. The full-length mouse MLL4 protein has 5588aa. Dorigi et al. showed that a  
217 truncated MLL4 protein containing amino acids 1-5482 is unstable in ES cells<sup>18</sup>. In contrast, Rickels et al.  
218 showed that a more severely truncated MLL4 protein containing amino acids 1-5402 is stable in ES cells  
219<sup>19</sup>. Future studies are needed to verify whether the SET domain is required for MLL3/4 protein stability in  
220 cells. Consistent with our previous report that ectopic expression of H3.3K4M reduces endogenous levels  
221 of MLL3/4 and MLL3/4-associated UTX protein in ES cells<sup>15</sup>, we now show that H3.3K4M destabilizes  
222 MLL3/4 and UTX proteins in preadipocytes and BAT. However, it remains to be determined  
223 mechanistically how H3.3K4M and the SET domains regulate MLL3/4 protein stability.

224 Although H3K4me1 is the predominant mark of a primed enhancer state, it is unclear whether  
225 H3K4me1 affects or simply correlates with enhancer activation in cell differentiation and development.  
226 Interestingly, the latest two studies from one group reported that MLL3/4-dependent H3K4me1 has an  
227 active role at enhancers by facilitating binding of the chromatin remodeler SWI/SNF complex and  
228 recruitment of the chromatin organization regulator cohesin complex to orchestrate long-range chromatin  
229 interactions in ES cells<sup>20,21</sup>. These findings imply that H3K4me1 is not simply a correlative outcome in  
230 enhancer regulation. Conversely, using CRISPR to generate catalytically inactive MLL3/4, another recent  
231 study surprisingly reported that MLL3/4 proteins, rather than MLL3/4-mediated H3K4me1, are required for  
232 enhancer activation and gene transcription in undifferentiated ES cells. However, the role of MLL3/4-  
233 mediated H3K4me1 in ES cell differentiation was not elucidated<sup>18</sup>. Thus, despite various efforts to  
234 uncover the role of H3K4me1 in enhancer function, it is still unclear whether H3K4me1 controls enhancer  
235 activation in cell differentiation. Therefore, future work will be needed to clarify the role of MLL3/4-  
236 mediated H3K4me1 in enhancer function during cellular differentiation and animal development.

## 237 **Methods**

### 238 **Plasmids, Antibodies and Chemicals**

239 The retroviral pQCXIP plasmids expressing FLAG-tagged wild type (WT) or mutants of histone H3.3  
240 including K4M, K9M, K27M and K36 were described previously<sup>14</sup>. The following homemade antibodies  
241 have been described: anti-MLL4#3<sup>22</sup>, anti-MLL3#3<sup>16</sup> and anti-UTX<sup>23</sup>. Anti-RbBP5 (A300-109A), anti-  
242 BRD4 (A301-985A100) and anti-MED1 (A300-793A) were from Bethyl Laboratories. Anti-SET1A/B

243 antibodies were described previously<sup>24</sup>. Anti-H3 (ab1791), anti-H3K4me1 (ab8895), anti-H3K4me2  
244 (ab7766), anti-H3K27ac (ab4729) and H3K36me3 (ab9050) were from Abcam. Anti-MLL1N (A700-010),  
245 anti-MLL1C (A300-374A), anti-Pol II (17-672), anti-H3K4me3 (07-473), anti-H3K9me2 (17-648), anti-  
246 H3K27me3 (07-449) and anti-H3K36me2 (07-369) were from Millipore. Anti-FLAG-M2 (F3165) and (Z)-4-  
247 Hydroxytamoxifen (4OHT) (H7904) were from Sigma.

## 248 **Generation of Mouse Strains**

249 To generate LSL-K4M transgenic mice, H3.3K4M and a 3' FLAG tag (H3.3K4M-FLAG) were fused  
250 downstream of CAG promoter with a loxP-STOP-loxP cassette in the middle of the pBT346.6 plasmid  
251 (AST-3029, Applied StemCell) (Figure 2a). H3.3K4M-FLAG of pQCXIP-H3.3K4M was subcloned into the  
252 pBT346.6; after confirmation by DNA sequencing, the plasmid was linearized by SpeI and ScaI, gel  
253 purified and injected into zygotes harvested from C57BL/6 mice. Founder mice were identified by  
254 genotyping. For genotyping the *LSL-K4M* alleles, PCR was done using the following primers: 5'-  
255 CTAGCTGCAGCTCGAGTGAACCATGGC-3' and 5'-TTCGCGGCCGCGAATTCCTAGGCGTAGTCG-3'.  
256 PCR amplified 524 bp from the *LSL-K4M* alleles.

257 *Mll3<sup>fl</sup>* mice were obtained from Jae W. Lee<sup>17</sup> (Figure 5a, left panel). To generate *Mll4SET*  
258 conditional KO mice, the loxP/FRT-flanked neomycin cassette was inserted at the 3' end of exon 51 and  
259 the single loxP site was inserted at the 5' end of exon 50 (Figure 5a, right panel). We electroporated the  
260 linearized targeted construct, which includes exons 50–51, into WT ES cells. After selection with G418,  
261 surviving clones were expanded for PCR genotyping to identify *Mll4SET<sup>flloxneo/+</sup>* ES cells, which were  
262 further micro-injected into mouse blastocysts following standard procedures. Mice bearing germline  
263 transmission (*Mll4SET<sup>flloxneo/+</sup>*) were crossed with FLP1 mice (Jackson no. 003946) to generate *Mll4SET<sup>fl/+</sup>*  
264 mice. For genotyping the *Mll3* and *Mll4SET* alleles, PCRs were done using the following primers: *Mll3* (5'-  
265 GTCATCGGTGTGGTCTGAATGA-3' and 5'-AACCGGAAGGAGAAGCTTTATGA-3') and *Mll4SET* (5'-  
266 CAGTTGAGCTAGTCAAGTGATT-3' and 5'-TTCAATGTGGAGGGGAGTGACAG-3'). PCR amplified 174  
267 bp from the wild-type *Mll3* and 208 bp from the *Mll3* floxed allele, or 277 bp from the wild-type *Mll4* and  
268 346 bp from the *Mll4SET* floxed allele.

269 LSL-K4M mice and *Mll3<sup>fl</sup>;Mll4SET<sup>fl</sup>* mice were crossed with *Myf5-Cre* (Jackson no. 007893),  
270 *Cre-ER* (Jackson no. 008463), or *Adipoq-Cre* (Jackson no. 028020) to generate LSL-K4M;*Myf5-Cre*, LSL-

271 K4M;*Cre-ER*, LSL-K4M;*Adipoq-Cre*, *MII4SET<sup>fl/fl</sup>*; *Myf5-Cre*, *MII3<sup>fl/fl</sup>*; *MII4SET<sup>fl/fl</sup>*; *Myf5-Cre*, or  
272 *MII3<sup>fl/fl</sup>*; *MII4SET<sup>fl/fl</sup>*; *Cre-ER* mice.

### 273 **Histology and Immunohistochemistry**

274 E18.5 embryos were isolated and fixed in 4% paraformaldehyde, dehydrated in ethanol and embedded in  
275 paraffin for sectioning. Paraffin sections were stained with routine H&E or subjected to  
276 immunohistochemistry using anti-Ucp1 (ab10983; Abcam) and anti-Myosin (MF20; Developmental  
277 Studies Hybridoma Bank) antibodies as described <sup>4</sup>.

### 278 **Immortalization of Primary Brown Preadipocytes and Adipogenesis**

279 Primary brown preadipocytes were isolated from interscapular BAT of newborn LSL-K4M;*Cre-ER* or  
280 *MII3<sup>fl/fl</sup>*; *MII4SET<sup>fl/fl</sup>*; *Cre-ER* pups, and immortalized by SV40T. Isolation, immortalization and adipogenesis  
281 assays of brown preadipocytes were done as described <sup>25,26</sup>.

### 282 **Western Blot and qRT-PCR**

283 Western blot of histone modifications using acid extracts or of nuclear proteins using nuclear extracts  
284 were done as described <sup>15</sup>. Total RNA was extracted using TRIzol (Invitrogen) and reverse transcribed  
285 using ProtoScript II first-strand cDNA synthesis kit (NEB), following the manufacturers' instructions. qRT-  
286 PCR was done using the following SYBR green primers: *H3.3K4M* (forward, 5'-  
287 AACCTGTGTGCCATCCACG-3', and reverse, 5'-CGACTTGTCATCGTCGTCCTT-3'), *MII3* (forward, 5'-  
288 GATTGACGCCACACTCACAG-3', and reverse, 5'-TTTCTGTATCCTCCGGTTGG-3'), and *MII4SET*  
289 (forward, 5'-GGGTGGAGAGCTGTCAGAATTATT-3', and reverse, 5'-CATGAGCGGTA ACTCCATCAGA-  
290 3'). SYBR green primers for other genes were described previously <sup>27</sup>.

### 291 **RNA-Seq and ChIP-seq**

292 RNA-seq and ChIP-seq were performed as described in detail previously with the use of Illumina HiSeq  
293 2500 <sup>4,6,7</sup>. For RNA-seq, we purified mRNAs using Dynabeads mRNA purification kit (Invitrogen) then  
294 synthesized double-stranded cDNAs using SuperScript Double-stranded cDNA Synthesis kit (Invitrogen),  
295 following the manufacturers' instructions. For ChIP-seq, we collected ChIP-DNA using Dynabeads Protein  
296 A (Invitrogen) then purified DNA using QIAquick PCR Purification Kit (QIAGEN), following the

297 manufacturers' instructions. Library construction for RNA-seq and ChIP-seq was completed using  
298 NEBNext Ultra II DNA Library Prep Kit (NEB), following the manufacturers' instructions.

### 299 **Computational Analysis and Data Availability**

300 For differentially expressed genes from RNA-seq data, gene ontology (GO) analysis was carried out  
301 using DAVID (<https://david.ncifcrf.gov>). To identify H3K4me1 or H3K27ac enriched regions at D4 of  
302 adipogenesis in LSL-K4M;*CreER* brown preadipocytes, we used 'SICER' method<sup>28</sup> with window size of  
303 200 bp and with an estimated false discovery rate (FDR) threshold of  $10^{-3}$ . MLL4 ChIP-Seq data at D2 of  
304 adipogenesis was downloaded (GSE74189)<sup>4</sup> and the window size was chosen to be 50 bp. To define  
305 MLL4<sup>+</sup> active enhancers during adipogenesis, we compared 13,871 MLL4 binding sites at D2 with 64,757  
306 active enhancers (H3K4me1<sup>+</sup>H3K27ac<sup>+</sup> at D4). 6,686 MLL4<sup>+</sup> (10.3%, 6,686/64,757) sites were located on  
307 active enhancers. Heat maps were generated with 50 bp resolution and ranked according to the intensity  
308 of 6,686 MLL4<sup>+</sup> active enhancers at the center. Average profiles were plotted using the number of ChIP-  
309 Seq reads from the center of 6,686 MLL4<sup>+</sup> active enhancers to 10 kb on both sides. H3K4me1 and  
310 H3K27ac ChIP-seq signal intensity was normalized by histone Western blot for baseline modification  
311 levels to achieve more accurate quantitative analysis.

312 All datasets described in the paper have been deposited in NCBI Gene Expression Omnibus  
313 under accession number GSE110972.

### 314 **References**

- 315 1 Heinz, S., Romanoski, C. E., Benner, C. & Glass, C. K. The selection and function of cell type-  
316 specific enhancers. *Nat Rev Mol Cell Biol* **16**, 144-154, doi:10.1038/nrm3949 (2015).
- 317 2 Calo, E. & Wysocka, J. Modification of Enhancer Chromatin: What, How, and Why? *Molecular*  
318 *Cell* **49**, 825-837, doi:<http://dx.doi.org/10.1016/j.molcel.2013.01.038> (2013).
- 319 3 Froimchuk, E., Jang, Y. & Ge, K. Histone H3 lysine 4 methyltransferase KMT2D. *Gene* **627**, 337-  
320 342, doi:10.1016/j.gene.2017.06.056 (2017).
- 321 4 Lee, J. E. *et al.* H3K4 mono- and di-methyltransferase MLL4 is required for enhancer activation  
322 during cell differentiation. *Elife* **2**, e01503, doi:10.7554/eLife.01503 (2013).

- 323 5 Wang, C. *et al.* Enhancer priming by H3K4 methyltransferase MLL4 controls cell fate transition.  
324 *Proc Natl Acad Sci U S A*, doi:10.1073/pnas.1606857113 (2016).
- 325 6 Lai, B. *et al.* MLL3/MLL4 are required for CBP/p300 binding on enhancers and super-enhancer  
326 formation in brown adipogenesis. *Nucleic Acids Res* **45**, 6388-6403, doi:10.1093/nar/gkx234  
327 (2017).
- 328 7 Lee, J. E. *et al.* Brd4 binds to active enhancers to control cell identity gene induction in  
329 adipogenesis and myogenesis. *Nat Commun* **8**, 2217, doi:10.1038/s41467-017-02403-5 (2017).
- 330 8 Rosen, E. D. & MacDougald, O. A. Adipocyte differentiation from the inside out. *Nat Rev Mol Cell*  
331 *Biol* **7**, 885-896 (2006).
- 332 9 Lefterova, M. I. *et al.* PPAR{gamma} and C/EBP factors orchestrate adipocyte biology via  
333 adjacent binding on a genome-wide scale. *Genes Dev.* **22**, 2941-2952, doi:10.1101/gad.1709008  
334 (2008).
- 335 10 Nielsen, R. *et al.* Genome-wide profiling of PPAR{gamma}:RXR and RNA polymerase II  
336 occupancy reveals temporal activation of distinct metabolic pathways and changes in RXR dimer  
337 composition during adipogenesis. *Genes Dev.* **22**, 2953-2967, doi:10.1101/gad.501108 (2008).
- 338 11 Rosen, E. D. & Spiegelman, B. M. What we talk about when we talk about fat. *Cell* **156**, 20-44,  
339 doi:10.1016/j.cell.2013.12.012 (2014).
- 340 12 Cristancho, A. G. & Lazar, M. A. Forming functional fat: a growing understanding of adipocyte  
341 differentiation. *Nat Rev Mol Cell Biol* **12**, 722-734, doi:10.1038/nrm3198 (2011).
- 342 13 Lewis, P. W. *et al.* Inhibition of PRC2 activity by a gain-of-function H3 mutation found in pediatric  
343 glioblastoma. *Science* **340**, 857-861, doi:10.1126/science.1232245 (2013).
- 344 14 Chan, K. M., Han, J., Fang, D., Gan, H. & Zhang, Z. A lesson learned from the H3.3K27M  
345 mutation found in pediatric glioma: a new approach to the study of the function of histone  
346 modifications in vivo? *Cell Cycle* **12**, 2546-2552, doi:10.4161/cc.25625 (2013).
- 347 15 Jang, Y., Wang, C., Zhuang, L., Liu, C. & Ge, K. H3K4 Methyltransferase Activity Is Required for  
348 MLL4 Protein Stability. *J Mol Biol* **429**, 2046-2054, doi:10.1016/j.jmb.2016.12.016 (2017).

- 349 16 Cho, Y.-W. *et al.* PTIP Associates with MLL3- and MLL4-containing Histone H3 Lysine 4  
350 Methyltransferase Complex. *J. Biol. Chem.* **282**, 20395-20406, doi:10.1074/jbc.M701574200  
351 (2007).
- 352 17 Lee, J. *et al.* Targeted inactivation of MLL3 histone H3-Lys-4 methyltransferase activity in the  
353 mouse reveals vital roles for MLL3 in adipogenesis. *Proc Natl Acad Sci U S A* **105**, 19229-19234,  
354 doi:10.1073/pnas.0810100105 (2008).
- 355 18 Dorigi, K. M. *et al.* Mll3 and Mll4 Facilitate Enhancer RNA Synthesis and Transcription from  
356 Promoters Independently of H3K4 Monomethylation. *Mol Cell* **66**, 568-576 e564,  
357 doi:10.1016/j.molcel.2017.04.018 (2017).
- 358 19 Rickels, R. *et al.* Histone H3K4 monomethylation catalyzed by Trr and mammalian COMPASS-  
359 like proteins at enhancers is dispensable for development and viability. *Nat Genet* **49**, 1647-1653,  
360 doi:10.1038/ng.3965 (2017).
- 361 20 Yan, J. *et al.* Histone H3 lysine 4 monomethylation modulates long-range chromatin interactions  
362 at enhancers. *Cell Res*, doi:10.1038/cr.2018.1 (2018).
- 363 21 Local, A. *et al.* Identification of H3K4me1-associated proteins at mammalian enhancers. *Nat*  
364 *Genet* **50**, 73-82, doi:10.1038/s41588-017-0015-6 (2018).
- 365 22 Cho, Y. W. *et al.* Histone Methylation Regulator PTIP Is Required for PPARgamma and  
366 C/EBPalpha Expression and Adipogenesis. *Cell Metab* **10**, 27-39 (2009).
- 367 23 Hong, S. *et al.* Identification of JmjC domain-containing UTX and JMJD3 as histone H3 lysine 27  
368 demethylases. *Proc Natl Acad Sci U S A* **104**, 18439-18444, doi:10.1073/pnas.0707292104  
369 (2007).
- 370 24 Lee, J. H., Tate, C. M., You, J. S. & Skalnik, D. G. Identification and characterization of the  
371 human Set1B histone H3-Lys4 methyltransferase complex. *J Biol Chem* **282**, 13419-13428  
372 (2007).
- 373 25 Park, Y. K. & Ge, K. Glucocorticoid Receptor Accelerates, but Is Dispensable for, Adipogenesis.  
374 *Mol Cell Biol* **37**, doi:10.1128/MCB.00260-16 (2017).

- 375 26 Park, Y. K. *et al.* Distinct Roles of Transcription Factors KLF4, Krox20, and Peroxisome  
376 Proliferator-Activated Receptor gamma in Adipogenesis. *Mol Cell Biol* **37**,  
377 doi:10.1128/MCB.00554-16 (2017).
- 378 27 Jin, Q. *et al.* Gcn5 and PCAF regulate PPARgamma and Prdm16 expression to facilitate brown  
379 adipogenesis. *Mol Cell Biol* **34**, 3746-3753, doi:10.1128/mcb.00622-14 (2014).
- 380 28 Zang, C. *et al.* A clustering approach for identification of enriched domains from histone  
381 modification ChIP-Seq data. *Bioinformatics* **25**, 1952-1958, doi:10.1093/bioinformatics/btp340  
382 (2009).
- 383 29 Zhuang, L., *et al.* Depletion of Nsd2-mediated histone H3K36 methylation impairs adipose tissue  
384 development and function. *Nat Commun*, *In press* (2018).

### 385 **Acknowledgements**

386 We thank Victoria Noe-Kim for helping computational analyses. This work was supported by the  
387 Intramural Research Program of NIDDK, NIH to KG.

### 388 **Author contributions**

389 YJ and KG conceived and designed the experiments. Y.J., C.W., Y-K.P., L.Z., J-E.L., A.B. and, E.F.  
390 performed experiments. Y.J., C.W., Y-K.P., L.Z., J-E.L. and, K.G. analyzed the data. Y.J., and C.L.  
391 generated LSL-K4M mice and C.W., and C.L. generated *Mll4SET<sup>fl</sup>* mice. Y.J. performed computational  
392 analyses. Y.J., A.B., and K.G. wrote the manuscript. K.G. supervised all the experiments.

### 393 **Additional information**

394 Supplementary Information:

395 Competing interests: We have no competing financial interests.

396 **Figure legends**

397 **Figure 1. Histone H3.3K4M and H3.3K36M mutations impair adipogenesis**

398 Immortalized brown preadipocytes were infected with retroviral vector (Vec) expressing FLAG-tagged wild  
399 type (WT) or K-to-M mutant histone H3.3, followed by adipogenesis assay.

400 (a) Histone extracts from preadipocytes were subjected to Western blot analyses using antibodies  
401 indicated on the left. Long exposure of histone H3 Western blot reveals the relative levels of ectopic H3.3  
402 and endogenous H3. (b) 6 days after induction of differentiation, cells were stained with Oil Red O. Upper  
403 panels, stained dishes; lower panels, representative fields under microscope. (c) qRT-PCR of *Pparg*,  
404 *Cebpa* and *Fabp4* expression at day 0 (D0) and day 6 (D6) of adipogenesis. Quantitative PCR data in all  
405 figures except Figure 8 are presented as means  $\pm$  SD.

406 **Figure 2. H3.3K4M prevents adipose tissue and muscle development**

407 (a) Schematic of lox-STOP-lox-H3.3K4M (LSL-K4M) transgene and breeding scheme. The LSL-K4M  
408 transgene consists of the following elements from 5' to 3': a CAG promoter, quadruple copies of SV40  
409 stop signals flanked by two loxP sites, H3.3K4M with C-terminal FLAG and HA tags, and polyadenylation  
410 signal. LSL-K4M transgenic mice were crossed with *Myf5-Cre* to generate mice expressing ectopic  
411 H3.3K4M in brown adipose tissue (BAT) and muscle. The locations of PCR genotyping primers P1 and  
412 P2 are indicated by arrows. (b) PCR genotyping of LSL-K4M transgenic mice. (c) Genotype of progeny  
413 from crossing between LSL-K4M and *Myf5-Cre* at 3 weeks age, new born pups (P0) and E18.5 embryos.  
414 LSL-K4M;*Myf5-Cre* mice died soon after birth from breathing malfunction due to defects in muscles of the  
415 rib cage. (d) Representative morphology of P0 pups. (e) Representative morphology of E18.5 embryos. (f)  
416 Histological analysis of E18.5 embryos. Sagittal sections of cervical/thoracic area were stained with H&E  
417 (left panels) or with antibodies against the BAT (B) marker UCP1 (green) and the muscle (M) marker  
418 Myosin (red) (right panels). *Scale bar* = 80  $\mu$ m.

419 **Figure 3. H3.3K4M destabilizes MLL3/4 proteins in adipogenesis**

420 Immortalized LSL-K4M;*Cre-ER* brown preadipocytes were treated with 4-hydroxytamoxifen (4OHT) to  
421 induce ectopic H3.3K4M expression, followed by adipogenesis assay.



422 (a–b) H3.3K4M destabilizes MLL3/4 proteins. Histone extracts (a) or nuclear extracts (b) were analyzed  
423 by Western blot using antibodies indicated on the left.

424 (c–e) H3.3K4M prevents adipogenesis and induction of adipocyte genes. (c) Cell growth rates.  $5 \times 10^5$   
425 preadipocytes were plated at D0 and the cumulative cell numbers were determined every day for 5 days.

426 (d) Oil red O staining at day 7 (D7) of adipogenesis. (e) qRT-PCR of H3.3K4M-FLAG, *Pparg*, *Cebpa*,  
427 *Fabp4* and *Ucp1* expression at D0 and D7 of adipogenesis.

428 (f–h) RNA-seq analyses were performed at D7 of adipogenesis. (f–g) Identification (f) and heat map (g) of  
429 down- or up-regulated genes in H3.3K4M-expressing cells. The cut-off for differential expression is 2.5-  
430 fold. (h) Gene ontology (GO) analysis of gene groups defined in (f).

#### 431 **Figure 4. H3.3K4M prevents MLL3/4-mediated enhancer activation in adipogenesis**

432 4OHT-treated LSL-K4M;*Cre-ER* brown preadipocytes were collected at D4 of adipogenesis for ChIP-seq  
433 of H3K4me1 and H3K27ac (a–b), ChIP of MLL4, H3K4me1, H3K27ac, BRD4, MED1 and Pol II, and qRT-  
434 PCR of eRNAs (c–e).

435 (a–b) Heat maps (a) and average profiles (b) around MLL4<sup>+</sup> active enhancers during adipogenesis. (c)

436 Genome browser view of H3K4me1 and H3K27ac on *Pparg* and *Cebpa* gene loci during adipogenesis  
437 with schematic of genomic locations of representative MLL4<sup>+</sup> active enhancers (e1–e5). MLL4 binding

438 data were obtained from <sup>4</sup>. (d) ChIP-qPCR analyses of indicated factors are shown on enhancers e1–e5 at  
439 D0 and D4 of adipogenesis. An enhancer of constitutively expressed gene *Jak1* was chosen as negative

440 control (n). (e) qRT-PCR of eRNA transcription on enhancers e1–e5 at D0 and D4 of adipogenesis. (f)

441 Proposed model showing that H3.3K4M prevents enhancer activation in adipogenesis by destabilizing  
442 MLL3/4.

#### 443 **Figure 5. Deletion of the enzymatic SET domain of MLL3/4 prevents adipose tissue and muscle** 444 **development**

445 (a) Conditional KO mouse lines targeting the SET domain of MLL3 and MLL4. Schematics of WT allele,  
446 targeted allele, conditional KO (floxed) allele and KO allele are shown in upper panels. Deletion of neomycin  
447 selection cassette by FLP recombinase generates the floxed allele. The locations of PCR genotyping  
448 primers P1–P4 are indicated by arrows. Expected protein domains and molecular weights are shown in

449 bottom panels. (b) PCR genotyping of flox and WT alleles using P1-P4 primers. (c) Genotypes of progeny  
450 at E18.5 from crossing between *Mll3<sup>ff</sup>;Mll4SET<sup>ff</sup>* (f/f;f/f) and *Mll3<sup>ff</sup>;Mll4SET<sup>ff</sup>;Myf5-Cre*.  
451 *Mll3<sup>ff</sup>;Mll4SET<sup>ff</sup>;Myf5-Cre* and *Mll3<sup>ff</sup>;Mll4SET<sup>ff</sup>;Myf5-Cre* (conditional double KO, DKO) mice died  
452 immediately after cesarean section from breathing malfunction due to defects in muscles of the rib cage.  
453 (d) Representative morphology of E18.5 embryos. (e) Histological analysis of E18.5 embryos. Sagittal  
454 sections of cervical/thoracic area were stained with H&E (upper panels) or with antibodies against the  
455 BAT (B) marker UCP1 (green) and the muscle (M) marker Myosin (red) (lower panels). *Scale bar* = 80  $\mu$ m.

456 **Figure 6. Deletion of the enzymatic SET domain inhibits adipogenesis by destabilizing MLL3/4**

457 Immortalized *Mll3<sup>ff</sup>;Mll4SET<sup>ff</sup>;Cre-ER* brown preadipocytes were treated with 4OHT to induce deletion of  
458 the exons encoding the SET domain of MLL3 and MLL4 proteins, followed by adipogenesis assay.

459 (a–b) Deletion of the enzymatic SET domain destabilizes MLL3/4 proteins. Histone extracts (a) or nuclear  
460 extracts (b) from preadipocytes were analyzed by Western blot using antibodies indicated on the left.

461 (c–e) Deletion of the SET domain of MLL3/4 prevents adipogenesis. (c) Cell growth rates. (d) Oil red O  
462 staining at D7 of adipogenesis. (e) qRT-PCR of *Mll3*, *Mll4SET*, *Pparg*, *Cebpa*, *Fabp4* and *Ucp1*  
463 expression at D0 and D7 of adipogenesis.

464 (f–i) RNA-seq analyses were performed at D7 of adipogenesis. (f) Genome browser views of RNA-Seq  
465 analysis on *Mll3* and *Mll4* loci. The targeted exons are highlighted in red boxes. (g–h) Schematic of  
466 identification (f) and heat map (h) of down- or up-regulated genes in double KO (DKO) cells. The cut-off  
467 for differential expression is 2.5-fold. (i) GO analysis of gene groups defined in (g).

468 **Figure 7. H3.3K4M expression mimics MLL3/4 SET domain deletion in preventing adipogenesis**

469 (a) Scatter plots of down- or up-regulated genes in H3.3K4M-expressing or MLL3/4 SET domain DKO  
470 cells compared to the respective control (Ctrl) cells. RNA-seq data were from Figures 3 and 6. The cut-off  
471 for differential expression is 2.5-fold. Down- or up-regulated genes are depicted in green and red,  
472 respectively. (b) Combined scatter plot showing correlation of fold changes of gene expression by  
473 H3.3K4M expression and by MLL3/4 SET domain DKO. (c–d) Venn diagram showing the overlap of  
474 down- or up-regulated genes in H3.3K4M-expressing and MLL3/4 SET domain DKO cells. (e–f) GO  
475 analysis of gene groups defined in (c–d).

476 **Figure 8. H3.3K4M does not affect adipose tissue maintenance and function**

477 All data were from 8 to 10-week-old male mice fed with regular diet.

478 (a-b) Histone extracts (a) or nuclear extracts (b) from BAT were analyzed by Western blot using  
479 antibodies indicated on the left. (c) Representative picture of BAT, inguinal WAT (iWAT), epididymal WAT  
480 (eWAT), and liver. (d) Fat mass, lean mass, and total body weight were measured by MRI ( $n=9$  per  
481 group). (e) The average tissue weights are presented as % of body weight ( $n=6$  per group). (f) qRT-PCR  
482 of *H3.3K4M*, *Pparg*, *Cebpa*, and *Fabp4* expression in BAT ( $n=6$  per group). (g-h) Cold tolerance test.  
483 Mice were housed at room temperature (RT, 22°C) and then in a cold room (6°C) for 6h ( $n=6$  per group).  
484 (g) Body temperatures. (h) qRT-PCR of gene expression in BAT after 6h. All values in Figure 8 are  
485 presented as mean  $\pm$  S.E.M.

486

# Figure 1. Histone H3.3K4M and H3.3K36M mutations impair adipogenesis

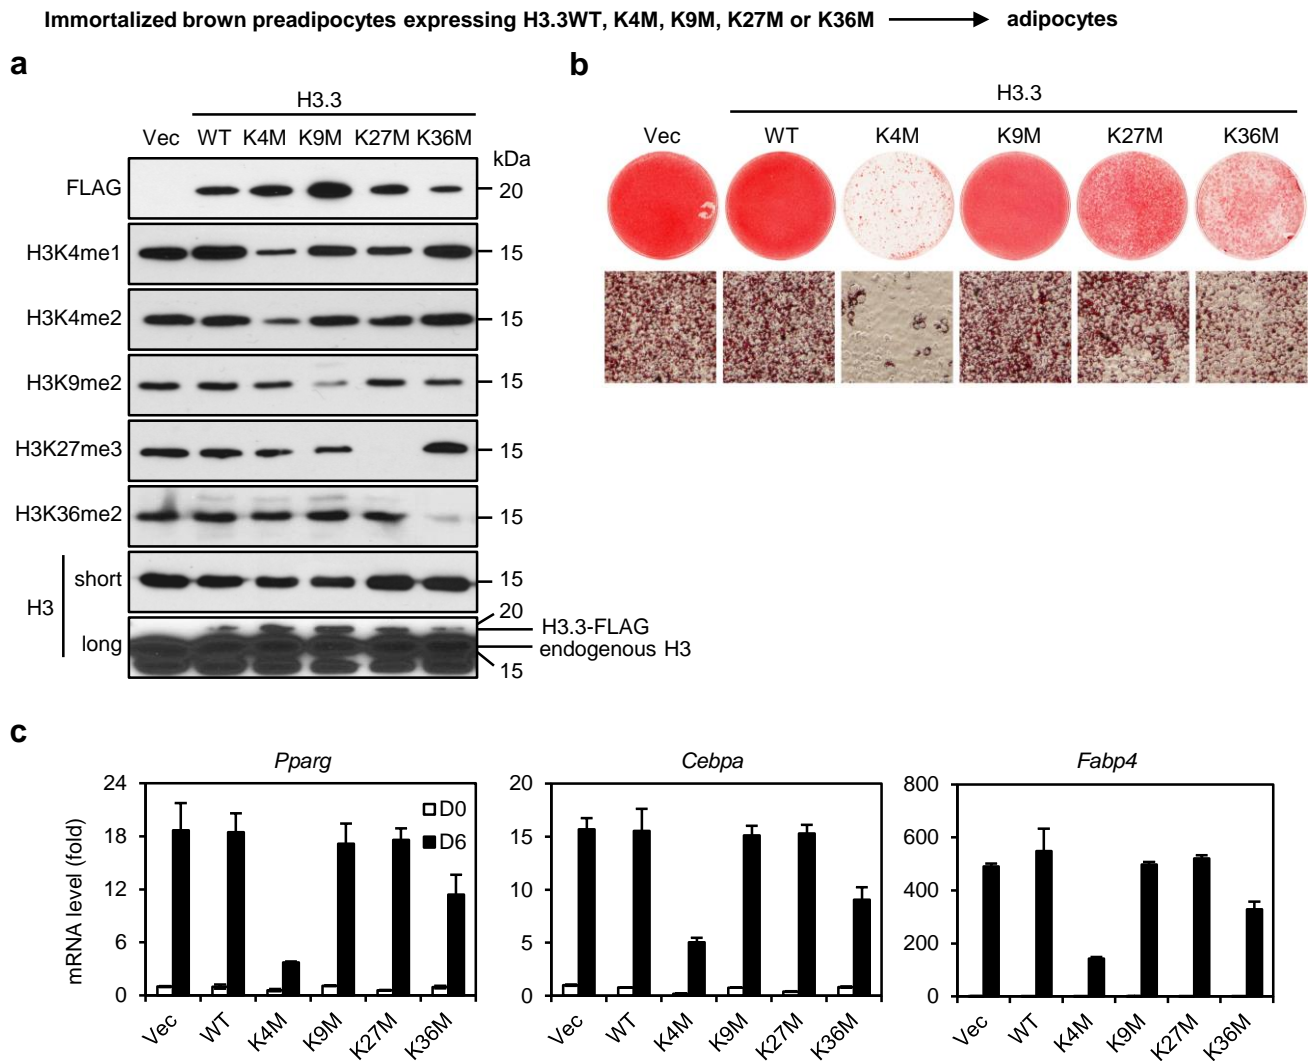

# Figure 2. H3.3K4M prevents adipose tissue and muscle development

**a** LSL-K4M transgene and breeding scheme

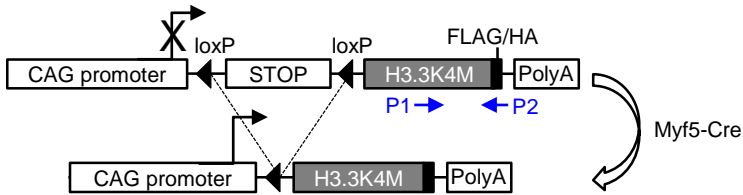

**b**

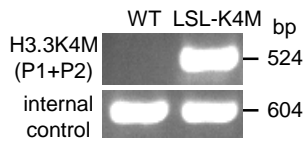

**c**

| LSL-K4M X <i>Myf5-Cre</i> |         |    |       |  |
|---------------------------|---------|----|-------|--|
| Genotype                  | 3 weeks | P0 | E18.5 |  |
| <i>WT</i>                 | 20      | 14 | 10    |  |
| <i>Myf5-Cre</i>           | 17      | 16 | 12    |  |
| LSL-K4M                   | 19      | 10 | 14    |  |
| LSL-K4M; <i>Myf5-Cre</i>  | 0       | 5* | 10    |  |

**d** P0

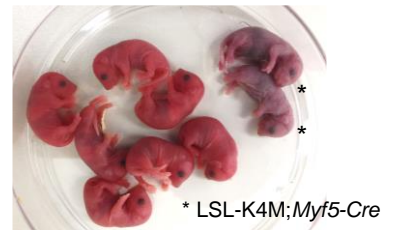

**e** E18.5

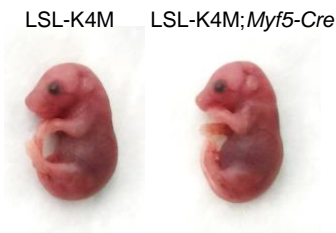

**f** H&E

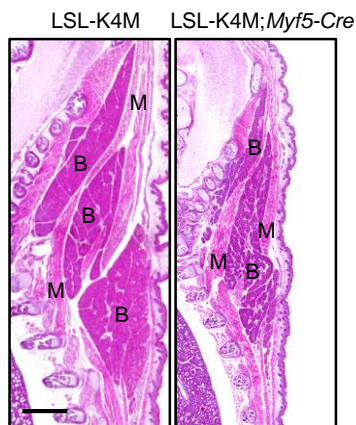

IHC

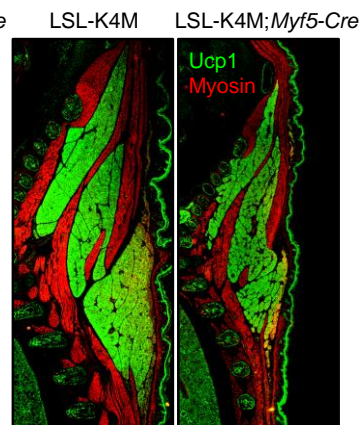

# Figure 3. H3.3K4M destabilizes MLL3/4 proteins in adipogenesis

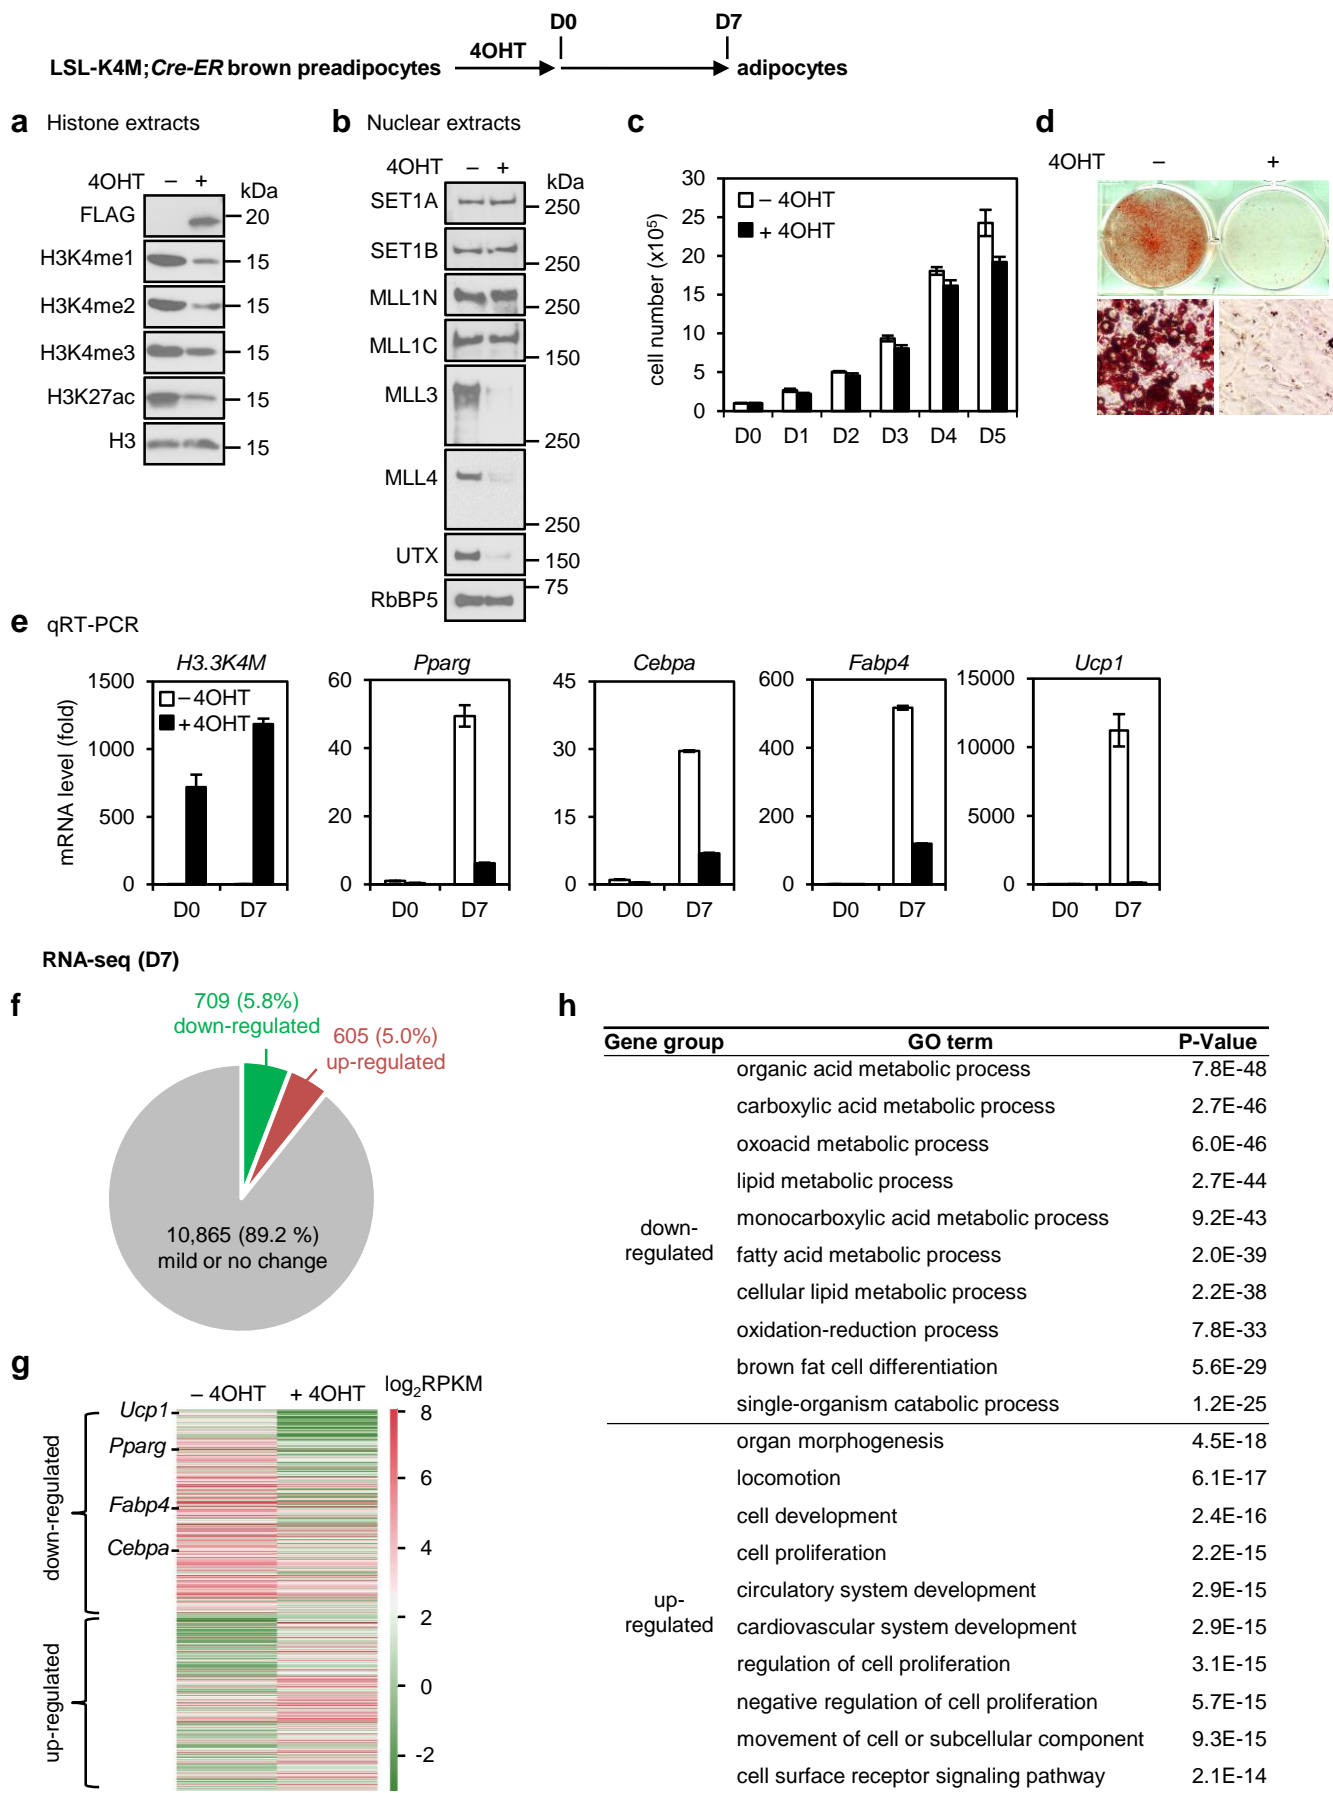



# Figure 5. Deletion of the enzymatic SET domain of MLL3/4 prevents adipose tissue and muscle development

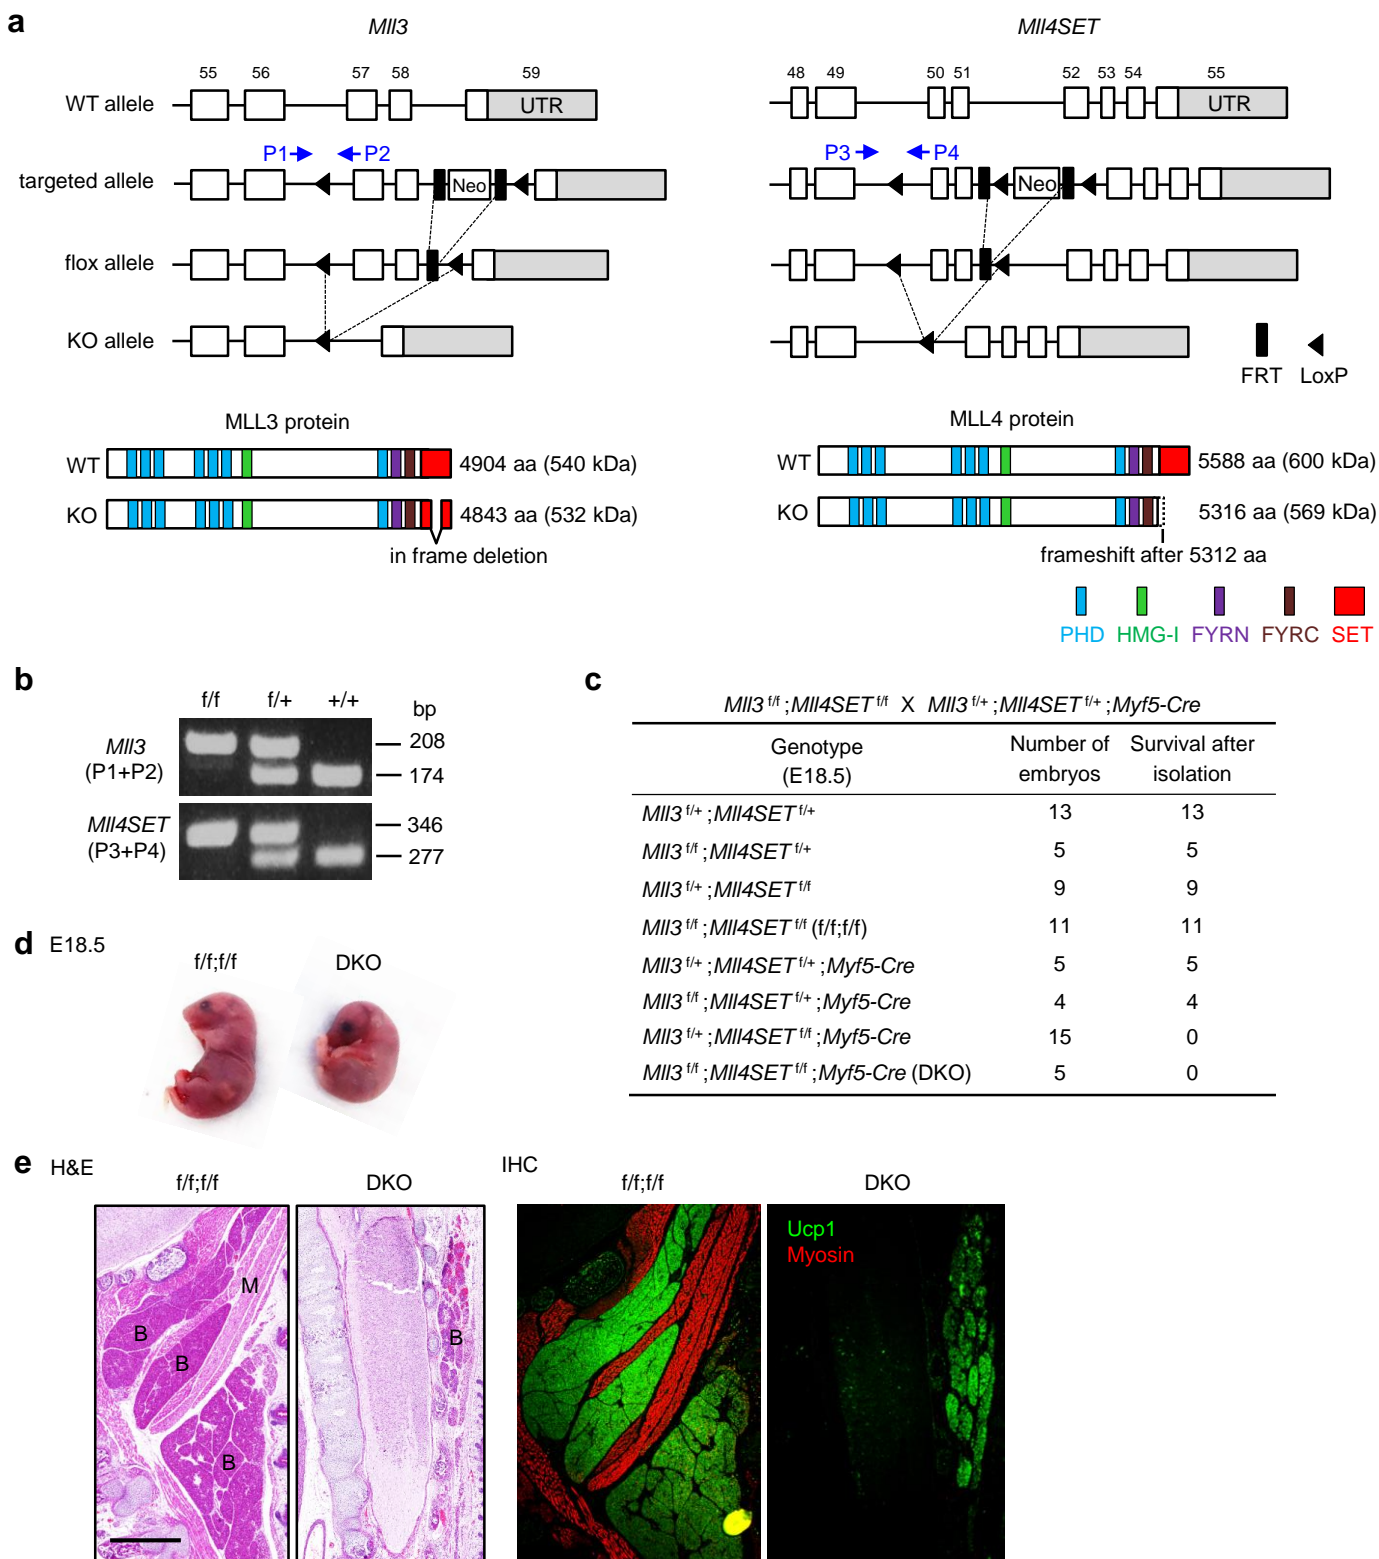



**Figure 6. Deletion of the enzymatic SET domain inhibits adipogenesis by destabilizing MLL3/4**

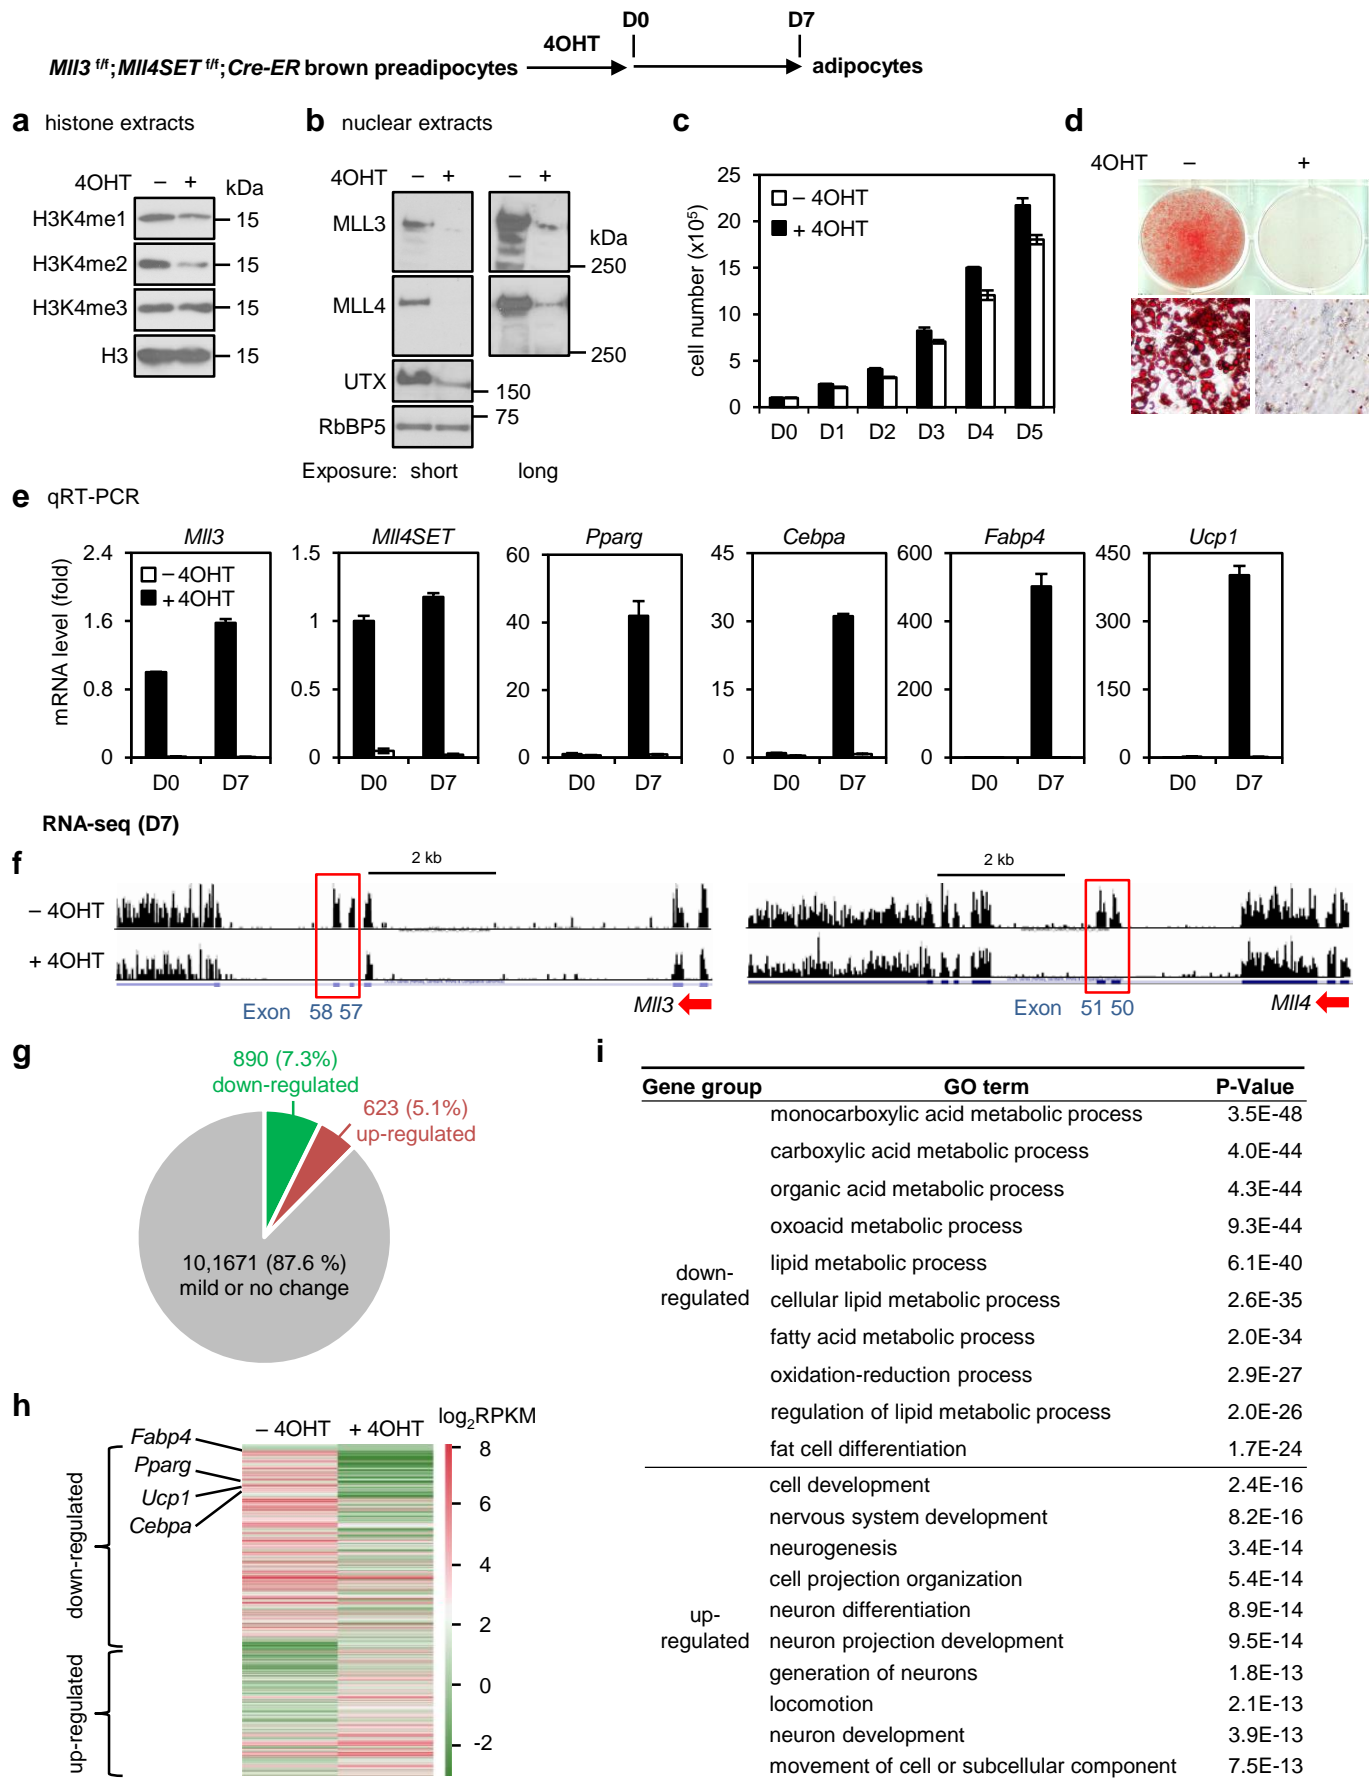

**Figure 7. H3.3K4M expression mimics MLL3/4 SET domain deletion in preventing adipogenesis**

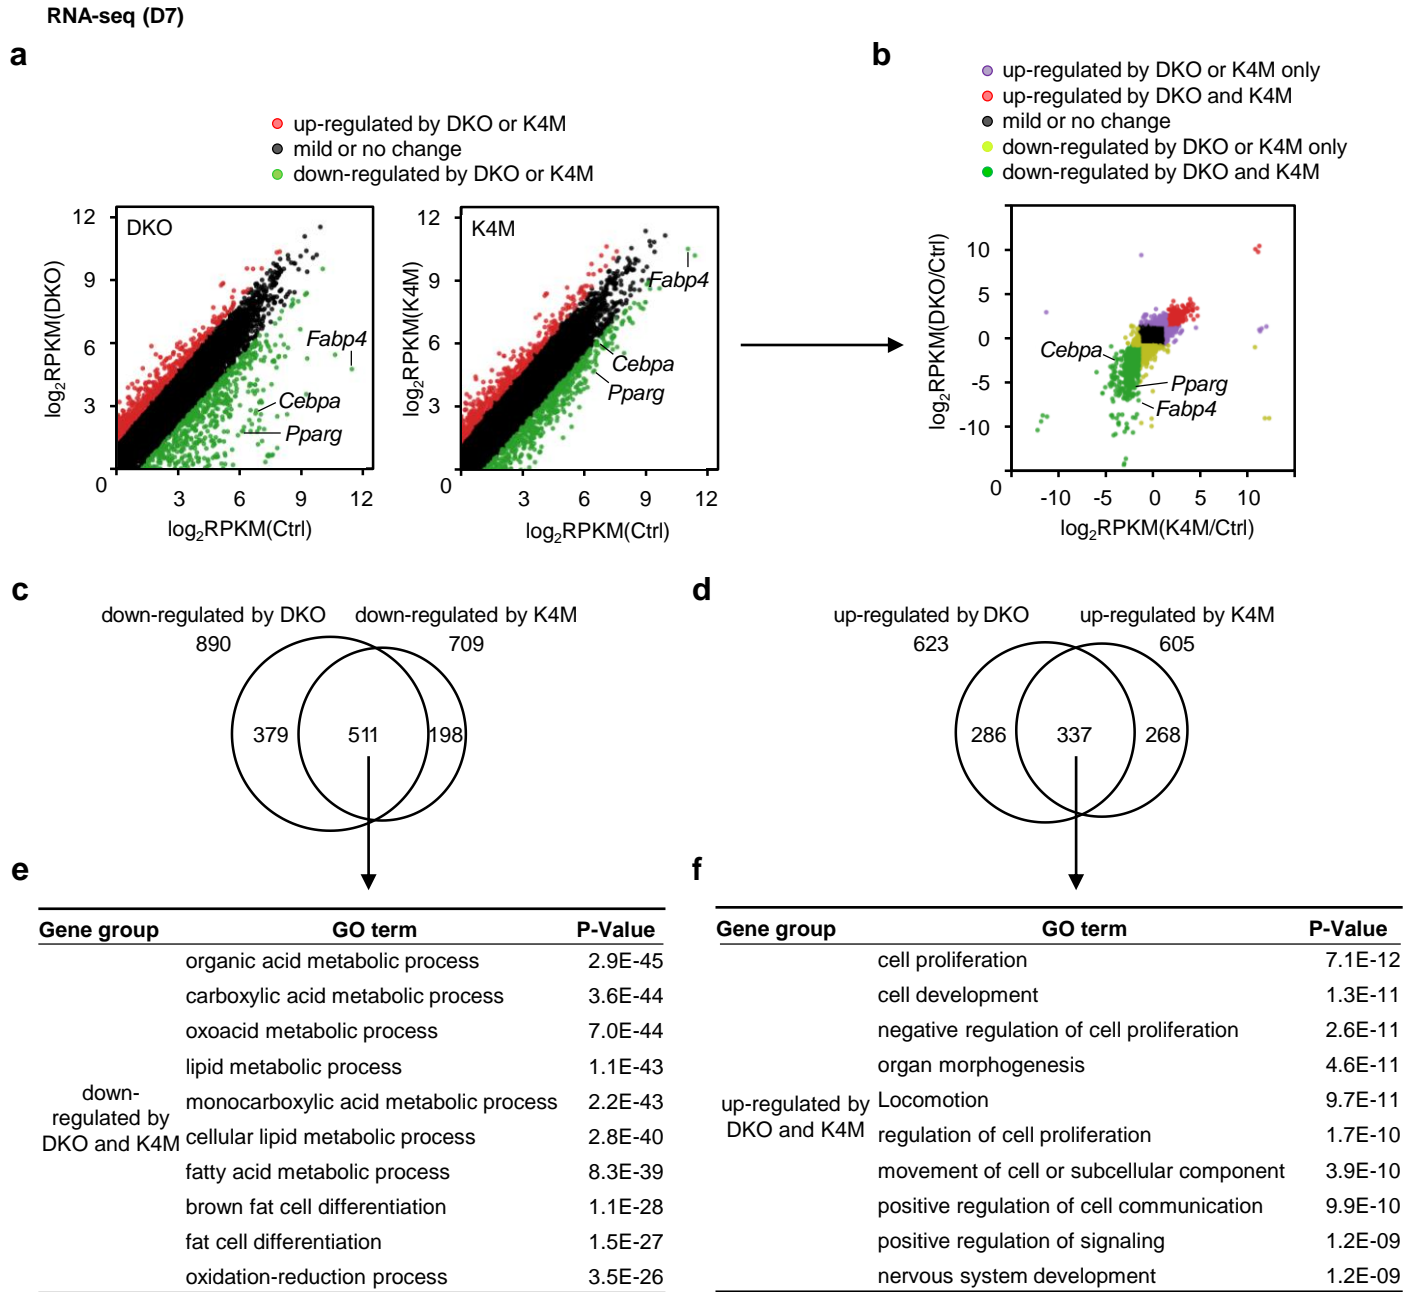

**Figure 8. H3.3K4M does not affect adipose tissue maintenance and function**

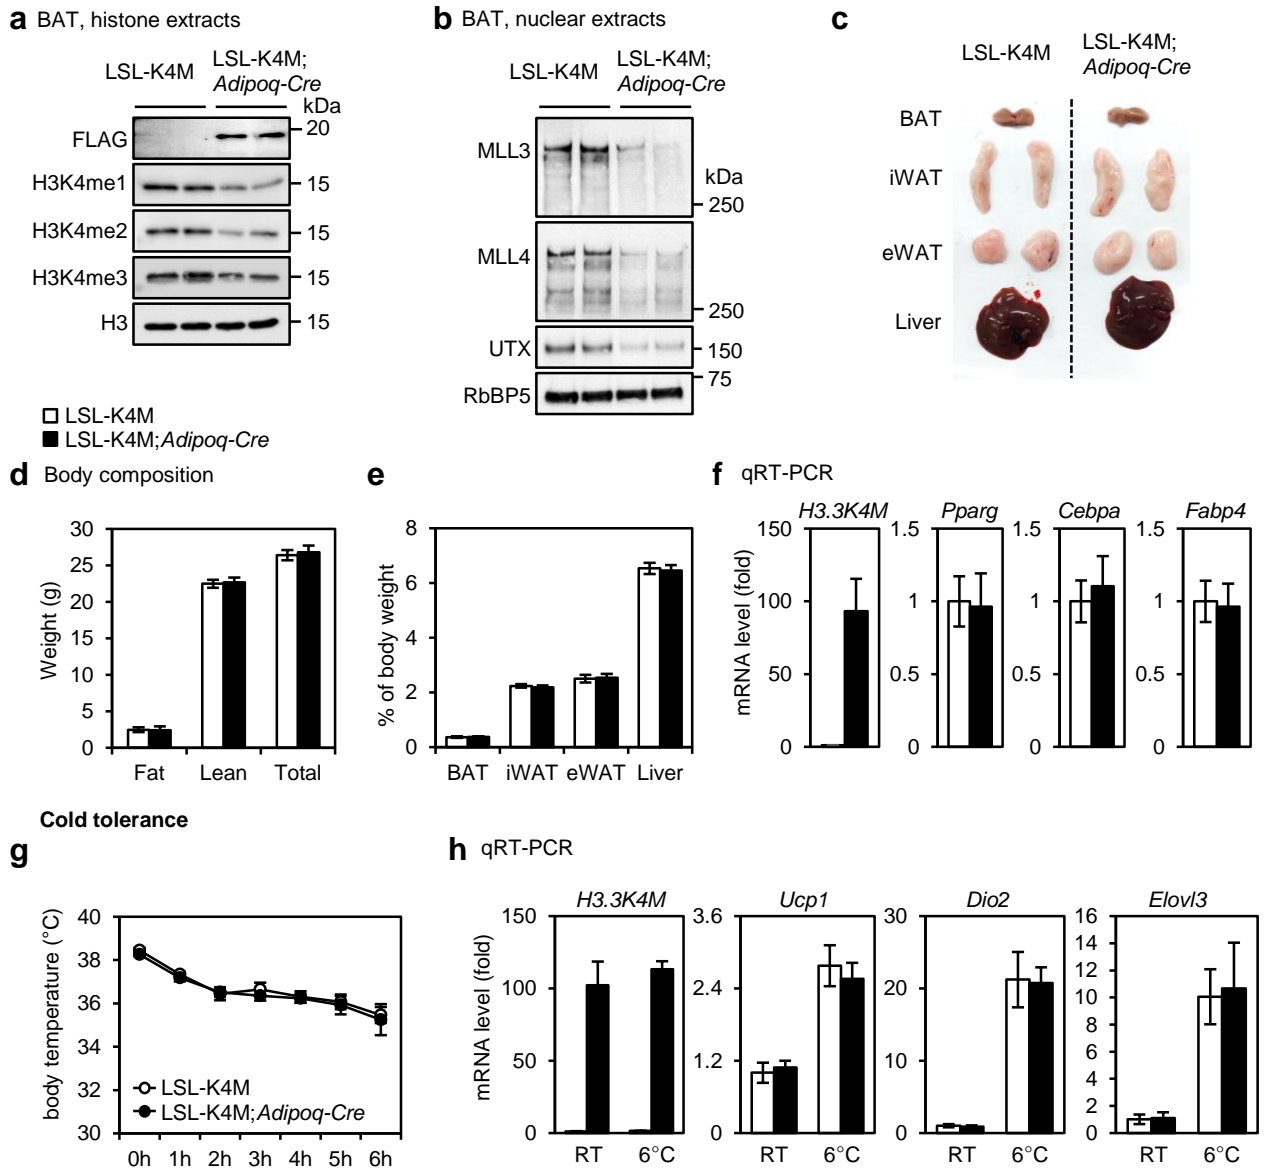

Source: https://www.biorxiv.org/content/10.1101/301986v1.full.pdf
